# Supplementary material for: Is There a “Biological Desert” With the Discovery of New Plant Viruses? A Retrospective Analysis for New Fruit Tree Viruses
Source: Front Microbiol. 2020 Nov 19;11:592816. doi: 10.3389/fmicb.2020.592816 (PMC7710903; doi:10.3389/fmicb.2020.592816)
Supplement: Supplementary Table 3 — Summary of the new viruses infecting fruit trees. [file Table_3.xlsx]

## Sheet: Sheet1
Table S3 Summary of the new viruses infecting fruit trees
	Virus/viroid name (abbr.)	Family	Genus	Group	Size (nt/bp)	Host
1	Apple green crinkle associated virus (AGCaV)	Betaflexiviridae	Foveavirus	ssRNA(+)	9266	apple; quince*
2	Temperate fruit decay associated virus (TFDaV)	Geminiviridae	Unassigned	ssDNA	3,442 (circular)	apple; pyrus; grapevine;
3	Apple geminivirus (AGV)	Geminiviridae	Unassigned	ssDNA	2,932 (circular)	apple; crabapple*
4	Apple necrotic mosaic virus (ApNMV)	Bromoviridae	Ilarvirus	ssRNA(+)	3,378; 2,767; 1,956	apple;
5	Apple hammerhead viroid (AHVd)	Avsunviroidae	Pelamoviroid	ssRNA(+)	433 (circular)	apple;
6	Apple rubbery wood virus -1 (ARWV-1)	Phenuiviridae	Rubodvirus	ssRNA(-)	7,200; 1,600; 1,300	apple;
7	Apple rubbery wood virus -2 (ARWV-2)	Phenuiviridae	Rubodvirus	ssRNA(-)	7300-7400; 1600; 1100-1500	apple;
8	Apple rubbery wood associated viruses-1 (ARWaV-1)	Phenuiviridae	Rubodvirus	ssRNA(-)	/	apple;
9	Apple rubbery wood associated viruses-2 (ARWaV-2)	Phenuiviridae	Rubodvirus	ssRNA(-)	/	apple;
10	Apple luteovirus 1 (ALV-1)	Luteoviridae	Luteovirus	ssRNA(+)	6001	apple;
11	Apple-associated luteovirus (AaLV)	Luteoviridae	Unassigned	ssRNA(+)	5890	apple;
12	Pyrus pyrifolia partitivirus 2 (PpPV2)	Partitiviridae	Alphapartitivirus	dsRNA	1,945; 1,877	Japanese pear;
13	Apple chlorotic fruit spot viroid (ACFSVd)	Pospiviroidae	Apscaviroid	ssRNA(+)	354 (circular)	apple;
14	Apple rootstock virus A (ApRVA)	Rhabdoviridae	Nucleorhabdovirus	ssRNA(-)	14043	apple;
15	Malus domestica virus A (MdoVA)	Closteroviridae	Velarivirus	ssRNA(+)	17003	apple;
16	Apricot vein clearing associated virus (AVCaV)	Betaflexivirida	Unassigned	ssRNA(+)	7315	apricot; Japanese plums*; Japanese apricot*; plum*; nectarine*
17	Caucasus prunus virus (CPrV)	Betaflexiviridae	Prunevirus	ssRNA(+)	8255	Japanese plums; almond
18	Prunus virus T (PrVT)	Betaflexiviridae	Tepovirus	ssRNA(+)	6835	plum; sweet cherry; cherry plum
19	Nectarine stem pitting-associated virus (NSPaV)	Luteoviridae	Luteovirus	ssRNA(+)	4491	nectarine; peach*; Japanese apricot*
20	Cherry rusty mottle-associated virus (CRMaV)	Betaflexiviridae	Robigovirus	ssRNA(+)	8397	sweet cherry
21	Cherry twisted leaf-associated virus (CTLaV)	Betaflexiviridae	Robigovirus	ssRNA(+)	8,426-8,431	sweet cherry; apricot
22	Nectarine virus M (NeVM)	Tymoviridae	Marafivirus	ssRNA(+)	6,421-6,701	nectarine
23	Cherry-associated luteovirus (ChALV)	Luteoviridae	Luteovirus	ssRNA(+)	5857	sweet cherry; sour cherry
24	Prunus virus F (PrVF)	Secoviridae	Fabavirus	ssRNA(+)	6,165; 3,622	sweet cherry; plum; cherry plum; sour cherry*
25	Peach leaf pitting-associated virus (PLPaV)	Secoviridae	Fabavirus	ssRNA(+)	6,357; 3,861	peach
26	Peach-associated luteovirus (PaLV)	Luteoviridae	Luteovirus	ssRNA(+)	5819	peach
27	Peach virus D (PeVD)	Tymoviridae	Marafivirus	ssRNA(+)	6612	peach
28	Peach virus T (PcVT)	Tymoviridae	Marafivirus	ssRNA(+)	6,618 (partial)	peach
29	Peach chlorotic leaf spot virus (PCLSV)	Betaflexiviridae	Trichovirus	ssRNA(+)	7,465-7,466	peach
30	Mume virus A (MuVA)	Betaflexivirida	Capillovirus	ssRNA(+)	7644	Japanese apricot; peach#
31	Prunus geminivirus A (PrGVA)	Geminiviridae	Grablovirus	ssDNA	3,174 (circular)	cherry; apricot; plum; peach#
32	Cherry virus F (CVF)	Secoviridae	Fabavirus	ssRNA(+)	5,664 (partial); 2,608	sweet cherry; sour cherry
33	Cherry robigovirus 5 (CRV-5)	Betaflexiviridae	Robigovirus	ssRNA(+)	8384	sweet cherry
34	Cherry virus Turkey (CVTR)	Betaflexivirida	Robigovirus	ssRNA(+)	8464	sweet cherry; sour cherry
35	Cherry virus B (ChVB)	Betaflexiviridae	Foveavirus	ssRNA(+)	8806	sweet cherry
36	Prunus yellow spot-associated virus (PYSaV)	Unassigned	Gratylivirus	ssRNA(+)	6072	David's peach
37	Peach virus 1 (PeV1)	Rhabdoviridae	Alphanucleorhabdovirus	ssRNA(+)	13949	peach
38	Citrus chlorotic dwarf associated virus (CCDaV)	Geminiviridae	Unassigned	ssDNA	3,640 (circular)	lemon; sour orange#; Mexican lime#; Eureka lemon#; Duncan grapefruit#
39	Citrus yellow vein clearing virus (CYVCV)	Alphaflexiviridae	Mandarivirus	ssRNA(+)	7531	lemon; sour orange#; Mexican lime#; Eureka lemon#; Duncan grapefruit#; Kinnow mandarin*; sweet oranges*; Weed species*
40	Citrus leprosis virus C2 (CiLV-C2)	Kitaviridae	Cilevirus	ssRNA(+)	8,717; 4,989	sweet orange; Hibiscus rosa-sinensis*; Dieffenbachia sp. *; Swinglea glutinosa*
41	Citrus vein enation virus (CVEV)	Luteoviridae	Enamovirus	ssRNA(+)	5983	sweet orange; Mexican lime#
42	Iranian citrus ringspot-associated virus (IrCRSaV)	Rhabdoviridae	Cytorhabdovirus	ssRNA(+)	/	sweet orange; Trifoliate orange#; Mexican lime#; Grapefruit#; sour orange#
43	Citrus jingmen-like virus (CJLV)	Flaviviridae	Flavivirus	ssRNA(+)	/	sweet orange
44	Citrus virga-like virus (CVLV)	Virgaviridae	Virgavirus	ssRNA(+)	/	sweet orange
45	Citrus leprosis virus N (CiLV-N)	Rhabdoviridae	Dichorhavirus	ssRNA(-)	6,268; 5,847	sweet orange
46	Citrus concave gum-associated virus (CCGaV)	Phenuiviridae	Phlebovirus	ssRNA(-)	6,681; 2,703	sweet orange; Clementine; Tangerine; Sweet orange#; Grapefruit#; Dweet tangor#; Rough lemon#
47	Citrus chlorotic spot virus (CiCSV)	Rhabdoviridae	Dichorhavirus	ssRNA(-)	6,518; 5,987	sweet orange; Talipariti tiliaceum; Agave desmettiana*
48	Citrus virus A (CiVA)	Unassigned	Coguvirus	ssRNA(-)	6,691; 2,740	sweet orange; Clementine; Mandarin; Grapefruit#; Rough lemon#; Dweet tangor #; pear*
49	Citrus yellow mottle-associated virus (CiYMaV)	Alphaflexiviridae	Mandarivirus	ssRNA(+)	7529	sweet orange; Chandler pummello#; Daidai sour orange#; Dweet tangor#; Eureka lemon#; Mexican lime#; Morocco sour orange#; Rough lemon#; Sweet orange#
50	Citrus Tunisia genomovirus 1 (CTNGmV-1)	Genomoviridae	Gemykolovirus	ssDNA	2191 (circular)	sweet orange
51	Citrus Tunisia genomovirus 2 (CTNGmV-2)	Genomoviridae	Gemycircularvirus	ssDNA	2156 (circular)	sweet orange
52	Blackberry virus E (BVE)	Alphaflexivirida	Allexivirus	ssRNA(+)	7718	blackberry
53	Raspberry leaf blotch virus (RLBV)	Bunyaviridae	Emaravirus	ssRNA(+)	7,062; 2,135; 1,365; 1,675; 1,718	raspberry
54	Blackberry vein banding-associated virus (BVBaV)	Closteroviridae	Ampelovirus	ssRNA(+)	18643	blackberry
55	Blackberry virus F (BVF)	Caulimoviridae	Badnavirus	dsDNA	7663	blackberry
56	Blackberry leaf mottle associated virus (BLMaV)	Bunyaviridae	Emaravirus	ssRNA(-)	7,050; 2,271; 1,510; 1,504; 1,224	blackberry
57	Blackberry virus A (BVA)	Betaflexiviridae	Vitivirus	ssRNA(+)	7285	blackberry
58	Currant latent virus (CuLV)	Secoviridae	Cheravirus	ssRNA(+)	6,603; 3,292	red currant
59	Currant virus A (CuVA)	Betaflexivirida	Capillovirus	ssRNA(+)	7925	red currant
60	Blackcurrant idaeovirus (BCIV)	Bromoviridae	Idaeovirus	ssRNA(+)	5,349; 2,278	blackcurrant
61	Blackcurrant leaf chlorosis associated virus (BCLCaV)	Bromoviridae	Idaeovirus	ssRNA(+)	5,349; 2,280	blackcurrant
62	Blackcurrant leafroll-associated virus 1 (BcLRaV-1)	Closteroviridae	Closterovirus	ssRNA(+)	16,996-17,313	blackcurrant; red currant
63	Black currant associated rhabdovirus (BCaRV)	Rhabdoviridae	Nucleorhabdovirus	ssRNA(+)	14432	blackcurrant
64	Ribes americanum virus A (RAVA)	Betaflexiviridae	Unassigned	ssRNA(+)	7106	American blackcurrant
65	Blackcurrant closterovirus 1 (BCCV-1)	Closteroviridae	Closterovirus	ssRNA(+)	17320	blackcurrant; red currant; white currant; gooseberry
66	Blueberry latent virus (BBLV)	Amalgamaviridae	Amalgavirus	ssRNA(+)	3431	blueberry
67	Blueberry latent spherical virus (BLSV)	Secoviridae	Nepovirus	ssRNA(+)	7,960; 6,344	blueberry
68	Blueberry necrotic ringblotch virus (BNRBV)	Bromoviridae	Blunervirus	ssRNA(+)	5,906; 3,935; 2,588; 1,724	blueberry
69	Blueberry virus A (BVA)	Closteroviridae	Unassigned	dsRNA	17798	blueberry
70	Blueberry mosaic associated virus (BlMaV)	Ophioviridae	Ophiovirus	ssRNA(-)	7,963; 1,934; 1,570	blueberry
71	Blueberry fruit drop associated virus (BFDaV)	Caulimoviridae	Unassigned	dsDNA	9,850 (circular)	blueberry
72	Blueberry green mosaic-associated virus (BGMaV)	Betaflexiviridae	Vitivirus	ssRNA(+)	7477	blueberry
73	Mulberry mosaic dwarf-associated virus (MMDaV)	Geminiviridae	Unassigned	ssDNA	2,952 (circular)	mulberry
74	Mulberry badnavirus 1 (MBV1)	Caulimoviridae	Badnavirus	dsDNA	6,945 (circular)	white mulberry
75	Persimmon viroid 2 (PVd2)	Pospiviroidae	Apscaviroid	ssRNA	358 (circular)	American persimmon
76	Persimmon virus A (PeVA)	Rhabdoviridae	Cytorhabdovirus	ssRNA(+)	13467	Japanese persimmon
77	Persimmon latent virus (PeLV)	Unassigned	Unassigned	dsRNA	7475	Japanese persimmon
78	Persimmon cryptic virus (PeCV)	Partitiviridae	Deltapartitivirus	dsRNA	1,577; 1,491	Japanese persimmon
79	Persimmon virus B (PeVB)	Closteroviridae	Unassigned	ssRNA(+)	18,569; 18,030	American persimmon
80	Actinidia chlorotic ringspot associated virus (AcCRaV)	Fimoviridae	Emaravirus	ssRNA(+)	7,061; 2,267; 1,678; 1,664; 1,476	kiwifruit
81	Actinidia virus 1 (AcV-1)	Closteroviridae	Unassigned	ssRNA(+)	18848	kiwifruit
82	Actinidia seed-borne latent virus (ASbLV)	Betaflexiviridae	Prunevirus	ssRNA(+)	8192	kiwifruit
83	Actinidia emaravirus 2 (AcEV-2)	Fimoviridae	Emaravirus	ssRNA(+)	7,079; 2,252; 1,387;	kiwifruit
Note: "/" refers to undetermined; " #" refers to host identified by grafting in first publication; "*" refers to host identified in citing publications.
